# Supplementary material for: Socioeconomic Position and DNA Methylation Age Acceleration Across the Life Course
Source: PubMed Central journal article supplement (PMC6211240; doi:10.1093/aje/kwy155), 2018-07-27
Supplement: kwy155_hughes_web_material_final.pdf [file kwy155_hughes_web_material_final.pdf]

## **Socioeconomic Position and DNA Methylation Age Acceleration Across the Life Course**

Amanda Hughes, Melissa Smart, Tyler Gorrie-Stone, Eilis Hannon, Jonathan Mill, Yanchun Bao, Joe Burrage, Leo Schalkwyk, and Meena Kumari

### Contents

Page 2: Web Table 1. List of missing probes

Page 3: Web Appendix: Inverse-Probability Weighting

Page 4: Web Table 2. Association of childhood social class with adult socioeconomic position measures in 2011–2012

Page 5: Web Table 3. Association of socioeconomic factors with DNA methylation age acceleration, not adjusted for smoking and body mass index, UK Household Longitudinal Study participants, 2011–2012

Page 6: Reference

**Web Table 1.** List of missing probes (probes included in Horvath and Hannum algorithms not profiled with the Illumina Infinium HumanMethylationEPIC array)

| <i>Horvath Missing Probes</i> |            |                     |
|-------------------------------|------------|---------------------|
| Probe ID                      | Chromosome | Gene Annotation     |
| cg02654291                    | 9          | C9orf64             |
| cg02972551                    | 2          | KDM3A;KDM3A         |
| cg09785172                    | 4          | WFS1;WFS1;WFS1;WFS1 |
| cg09869858                    | 12         | P11                 |
| cg13682722                    | 14         | C14orf102;C14orf102 |
| cg16494477                    | 5          | FGF18               |
| cg17408647                    | 7          | C7orf44;C7orf44     |
| cg19273182                    | 2          | PAPOLG;PAPOLG       |
| cg19945840                    | 1          | SDF4;SDF4;B3GALT6   |
| cg27319898                    | 7          | ZNF804B;ZNF804B     |
| cg04431054                    | 5          | PRRC1               |
| cg05590257                    | 17         | PLD6                |
| cg06117855                    | 3          | CLEC3B;CLEC3B       |
| cg19046959                    | 1          | COL8A2              |
| cg19569684                    | 5          | MGC29506            |
| cg24471894                    | 9          | KIAA0020            |
| cg27016307                    | 19         | HRC                 |
| cg02654291                    | 9          | C9orf64             |

  

| <i>Hannum Missing Probes</i> |            |                     |
|------------------------------|------------|---------------------|
| Probe ID                     | Chromosome | Gene Annotation     |
| cg24079702                   | 2          | FHL2;FHL2;FHL2;FHL2 |
| cg14361627                   | 7          | KLF14               |
| cg07927379                   | 7          | C7orf13;RNF32       |
| cg18473521                   | 12         | HOXC4;HOXC4         |
| cg09651136                   | 15         | PKM2;PKM2;PKM2      |
| cg21139312                   | 17         | MSI2;MSI2           |

## **Web Appendix: Inverse-Probability Weighting**

Weights for these analyses took into account initial sampling probabilities, attrition of BHPS participants prior to 2011, and differential nonresponse at the nurse visit, blood sampling and genetic/epigenetic sampling stages.

Inverse-probability weights for epigenetic analyses were constructed by building on existing weights by Lynn and colleagues (1). The base was a BHPS-specific longitudinal weight which takes account of initial sampling probabilities and assigns a non-zero value to BHPS participants who took part in the 2011–2012 nurse assessment and were present at mainstage interviews from 2001 to 2011. An add-on weight was created using information on demographic and health characteristics to take account of extra selection into the epigenetic sample, namely presence at two more BHPS waves in 1999 and 2000, inclusion at the blood sampling stage, and inclusion in genetic analysis. This was then combined with the existing weight. For sensitivity analyses involving alcohol consumption, this was further combined with an existing weight assigning non-zero values to participants who completed the self-completion section of the questionnaire at wave 2. For sensitivity analyses involving psychological distress at UKHLS wave 3, this was further combined with an existing weight assigning non-zero values to participants who completed the wave 3 self-completion questionnaire.

**Web Table 2.** Association<sup>a</sup> of childhood social class<sup>b</sup> with adult socioeconomic position measures in 2011–2012

|                                  | Age-specific current income quartiles (range 1-4; 1 = most advantaged) <sup>c</sup> |            | Number of times in the lowest income quartile, 1999–2011 <sup>d</sup> |             | Total months unemployed, 1999–2011 <sup>e</sup> |             | Age- and sex-standardized education (range 0-1; 1 = least educated) <sup>f</sup> |             |
|----------------------------------|-------------------------------------------------------------------------------------|------------|-----------------------------------------------------------------------|-------------|-------------------------------------------------|-------------|----------------------------------------------------------------------------------|-------------|
|                                  | Coeff                                                                               | 95% CI     | Coeff                                                                 | 95% CI      | Coeff                                           | 95% CI      | Coeff                                                                            | 95% CI      |
| Professional/managerial (ref)    | 0                                                                                   | Referent   | 0                                                                     | Referent    | 0                                               | Referent    | 0                                                                                | Referent    |
| Skilled nonmanual                | §0.28                                                                               | 0.03, 0.52 | -0.23                                                                 | -1.08, 0.61 | 0.29                                            | -1.58, 2.16 | 0.03                                                                             | -0.02, 0.09 |
| Skilled manual                   | §0.42                                                                               | 0.25, 0.59 | §0.73                                                                 | 0.15, 1.32  | 0.78                                            | -0.49, 2.05 | §0.10                                                                            | 0.06, 0.14  |
| Semiskilled/unskilled            | §0.65                                                                               | 0.44, 0.85 | §1.63                                                                 | 0.92, 2.34  | §2.66                                           | 1.11, 4.21  | §0.19                                                                            | 0.14, 0.23  |
| No parent employed/both deceased | §0.66                                                                               | 0.32, 1.00 | 1.03                                                                  | -0.20, 2.25 | §4.33                                           | 1.75, 6.91  | §0.15                                                                            | 0.07, 0.23  |

Abbreviations: CI = confidence interval.

<sup>a</sup> Associations are from linear regressions of the adult socioeconomic position variable on childhood social class, age, age<sup>2</sup> and sex. <sup>b</sup> Parental Registrar General's Social Classification when participant was aged 14.

<sup>c</sup> *N* = 1026.

<sup>d</sup> *N* = 874.

<sup>e</sup> *N* = 1025.

<sup>f</sup> *N* = 1024.

§ Results significant at *P* < 0.05.

**Web Table 3.** Association<sup>a</sup> of Socioeconomic Factors with DNA Methylation Age Acceleration, not adjusted for smoking and body mass index, UK Household Longitudinal Study participants, 2011–2012 (N = 1,094)

| <i>Quartiles of equivalized net household income (N = 1093/1094)</i> | Horvath <sup>a</sup> |             | Hannum <sup>a</sup>  |             |
|----------------------------------------------------------------------|----------------------|-------------|----------------------|-------------|
|                                                                      | $\Delta$ age (years) | 95% CI      | $\Delta$ age (years) | 95% CI      |
| Highest (ref)                                                        | 0                    | Referent    | 0                    | Referent    |
| 3                                                                    | -0.94                | -1.89, 0.01 | -0.33                | -1.02, 0.35 |
| 2                                                                    | 0.44                 | -0.48, 1.35 | 0.16                 | -0.57, 0.90 |
| Lowest                                                               | -0.68                | -1.58, 0.23 | -0.11                | -0.92, 0.70 |

  

| <i>Current employment status (participants aged &lt;65, N = 716/717)</i> | Horvath              |             | Hannum               |             |
|--------------------------------------------------------------------------|----------------------|-------------|----------------------|-------------|
|                                                                          | $\Delta$ age (years) | 95% CI      | $\Delta$ age (years) | 95% CI      |
| Employed (ref)                                                           | 0                    | Referent    | 0                    | Referent    |
| Self-employed                                                            | 0.78                 | -0.42, 1.99 | 0.05                 | -0.97, 1.07 |
| Unemployed                                                               | -1.18                | -3.05, 0.70 | -1.02                | -2.27, 0.22 |
| Retired                                                                  | -0.53                | -1.77, 0.70 | -0.29                | -1.33, 0.75 |
| Looking after home or family                                             | 0.87                 | -0.48, 2.23 | 0.49                 | -0.61, 1.59 |
| Long-term sick or disabled                                               | 2.07 <sup>b</sup>    | 0.66, 3.48  | -0.23                | -1.69, 1.24 |
| Other                                                                    | 1.61                 | -0.25, 3.46 | 1.17                 | -1.35, 3.69 |

  

| <i>Years in the lowest age-specific income quartile, 1999–2011 (N = 932/933)</i> | Horvath              |             | Hannum               |             |
|----------------------------------------------------------------------------------|----------------------|-------------|----------------------|-------------|
|                                                                                  | $\Delta$ age (years) | 95% CI      | $\Delta$ age (years) | 95% CI      |
| 0 (ref)                                                                          | 0                    | Referent    | 0                    | Referent    |
| 1-2                                                                              | 0.40                 | -0.49, 1.30 | 0.74                 | -0.09, 1.57 |
| 3-6                                                                              | -0.49                | -1.35, 0.37 | 0.05                 | -0.62, 0.71 |
| 7+                                                                               | -0.54                | -1.36, 0.28 | -0.13                | -0.84, 0.57 |

  

| <i>Total unemployment, 1999–2011 (N = 1091/1092)</i> | Horvath              |             | Hannum               |              |
|------------------------------------------------------|----------------------|-------------|----------------------|--------------|
|                                                      | $\Delta$ age (years) | 95% CI      | $\Delta$ age (years) | 95% CI       |
| None (ref)                                           | 0                    | Referent    | 0                    | Referent     |
| <12 months                                           | -0.68                | -1.64, 0.28 | -0.39                | -1.14, 0.37  |
| ≥12 months                                           | -0.29                | -1.65, 1.08 | -0.92 <sup>b</sup>   | -1.77, -0.06 |

  

| <i>Highest educational qualification<sup>c</sup> (N = 1088/1089)</i> | Horvath              |             | Hannum               |            |
|----------------------------------------------------------------------|----------------------|-------------|----------------------|------------|
|                                                                      | $\Delta$ age (years) | 95% CI      | $\Delta$ age (years) | 95% CI     |
| Least vs. most educated                                              | 0.44                 | -0.77, 1.66 | 1.01 <sup>b</sup>    | 0.05, 1.96 |

  

| <i>Childhood social class<sup>d</sup> (N = 1025/1026)</i> | Horvath              |             | Hannum               |             |
|-----------------------------------------------------------|----------------------|-------------|----------------------|-------------|
|                                                           | $\Delta$ age (years) | 95% CI      | $\Delta$ age (years) | 95% CI      |
| Professional/Managerial (ref)                             | 0                    | Referent    | 0                    | Referent    |
| Skilled nonmanual                                         | 1.38 <sup>b</sup>    | 0.21, 2.54  | 0.25                 | -0.55, 1.06 |
| Skilled manual                                            | 0.50                 | -0.27, 1.26 | 0.68 <sup>b</sup>    | 0.10, 1.26  |
| Semiskilled/unskilled                                     | 0.96                 | -0.06, 1.98 | 1.08 <sup>b</sup>    | 0.21, 1.95  |
| No parent employed/both deceased                          | 2.36 <sup>b</sup>    | 0.68, 4.05  | 1.84 <sup>b</sup>    | 0.70, 2.98  |

Abbreviation: CI = confidence interval.

<sup>a</sup> Adjusted for chronological age, age<sup>2</sup>, sex, blood cell count, and batch.

<sup>b</sup> Associations significant at  $P < 0.05$ .

<sup>c</sup> Standardized within categories of sex and 5-year age group. Range 0–1; higher scores indicate lower education.

<sup>d</sup> Parental Registrar General's Social Classification when participant was aged 14.

## Reference

1. McFall S, Petersen J, Kaminska O, et al. Understanding Society The UK Household Longitudinal Study Waves 2 and 3 Nurse Health Assessment, 2010 – 2012 Guide to Nurse Health Assessment. Colchester, UK: Institute for Social and Economic Research, University of Essex, 2014. URL: <https://www.understandingsociety.ac.uk/documentation/health-assessment/user-guide>. Accessed: 01/12/2017.
